# Supplementary material for: Upregulation of multiple key molecules is correlated with poor prognosis and immune infiltrates in hepatocellular carcinoma by bulk and single-cell RNA-seq
Source: publisher site journal article supplement (doi:10.18632/aging.206151), 2024-11-12
Supplement: Supplementary file [file aging-vnull-206151-supplementary-material-SD1.pdf]

## SUPPLEMENTARY FIGURES

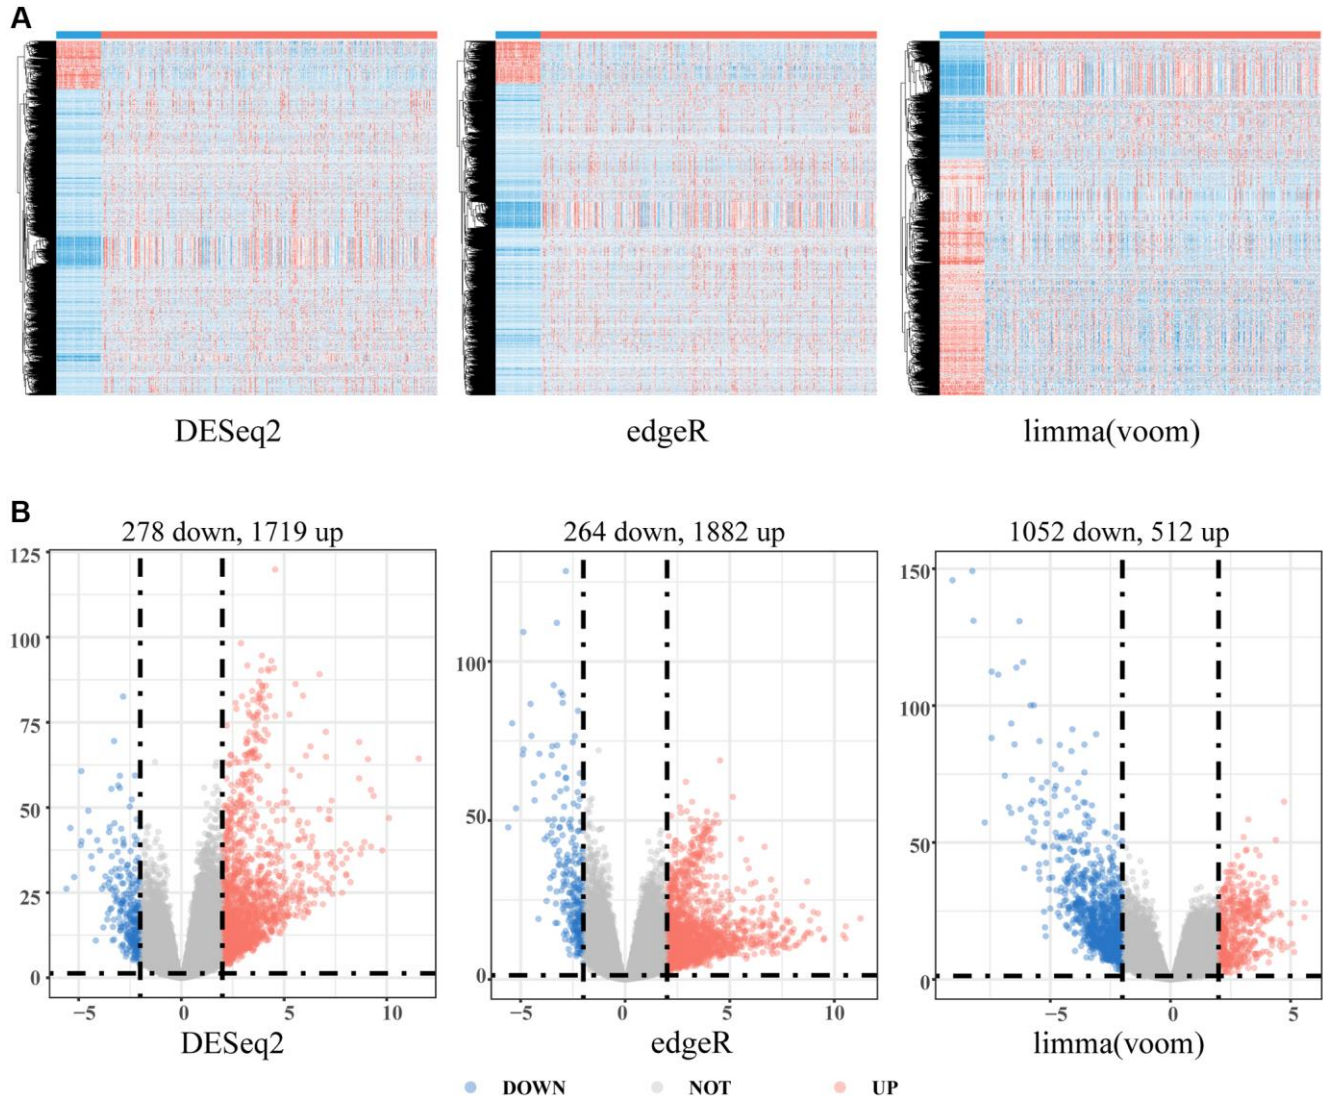

**Supplementary Figure 1. Three R packages difference analysis.** (A) The difference analysis heat map of R packages including DESeq2, edgeR and limma. (B) The difference analysis volcano map of R packages including DESeq2, edgeR and limma.

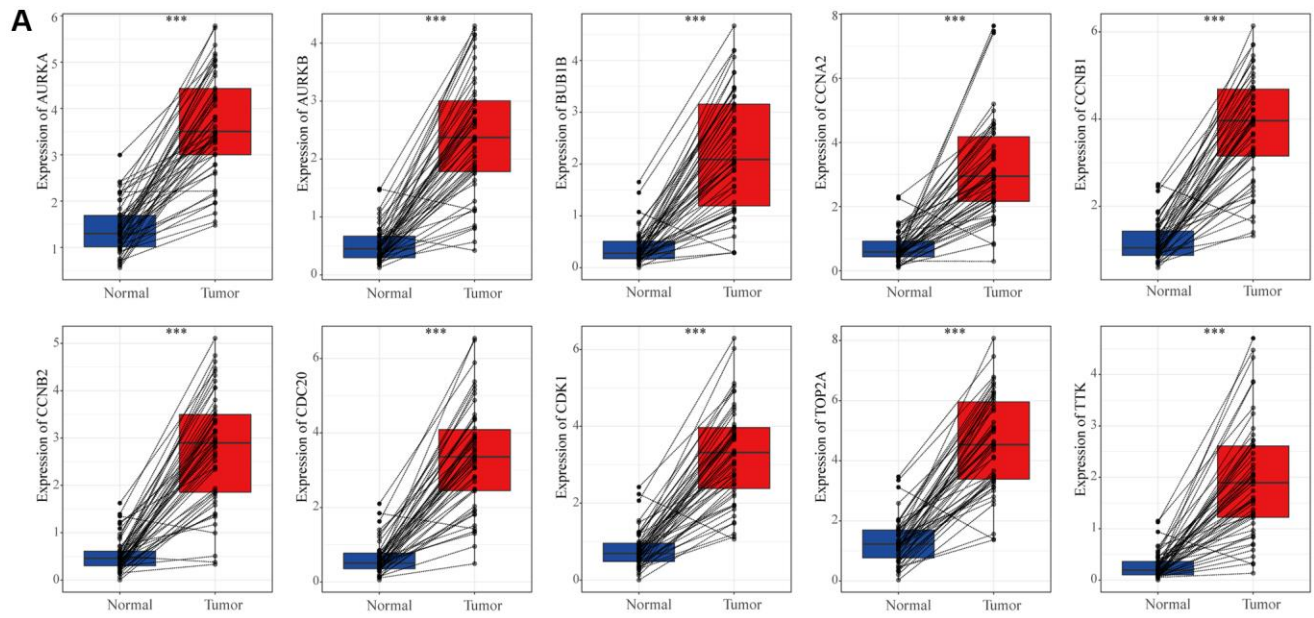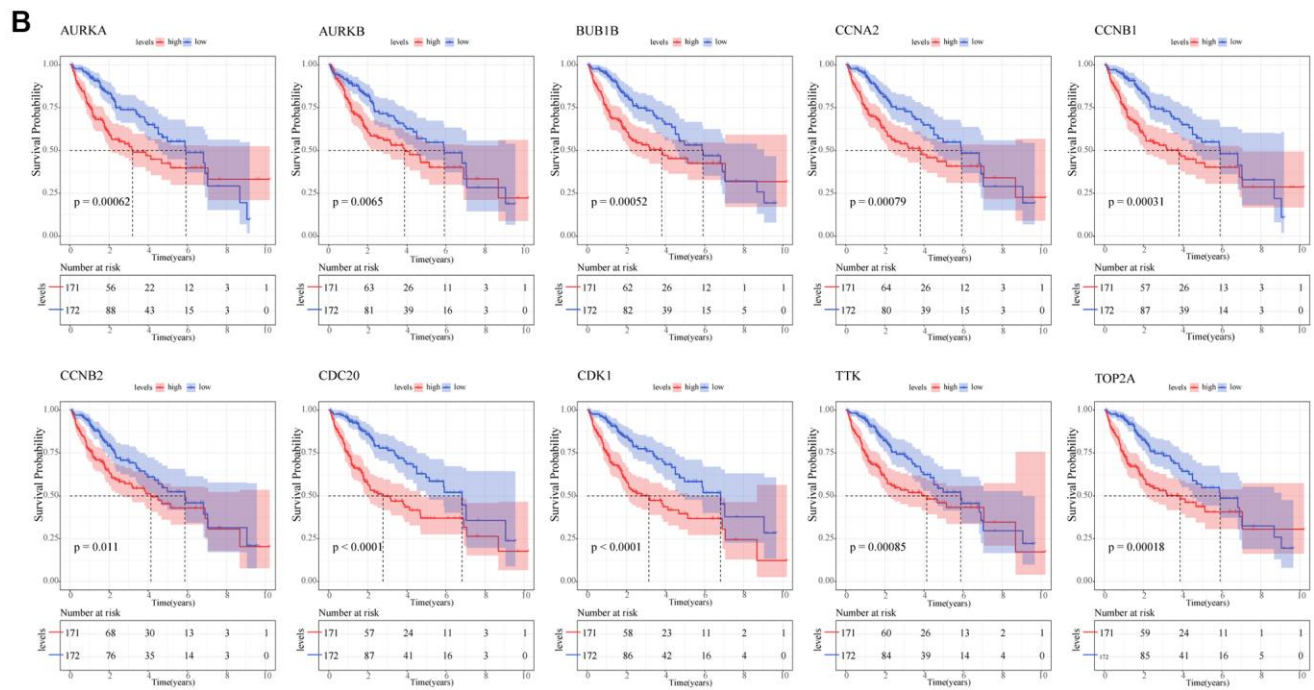

**Supplementary Figure 2. Expression analyses and survival analyses for the ten key molecules. (A) Differential analysis of key genes. (B) Survival analysis of key genes.**

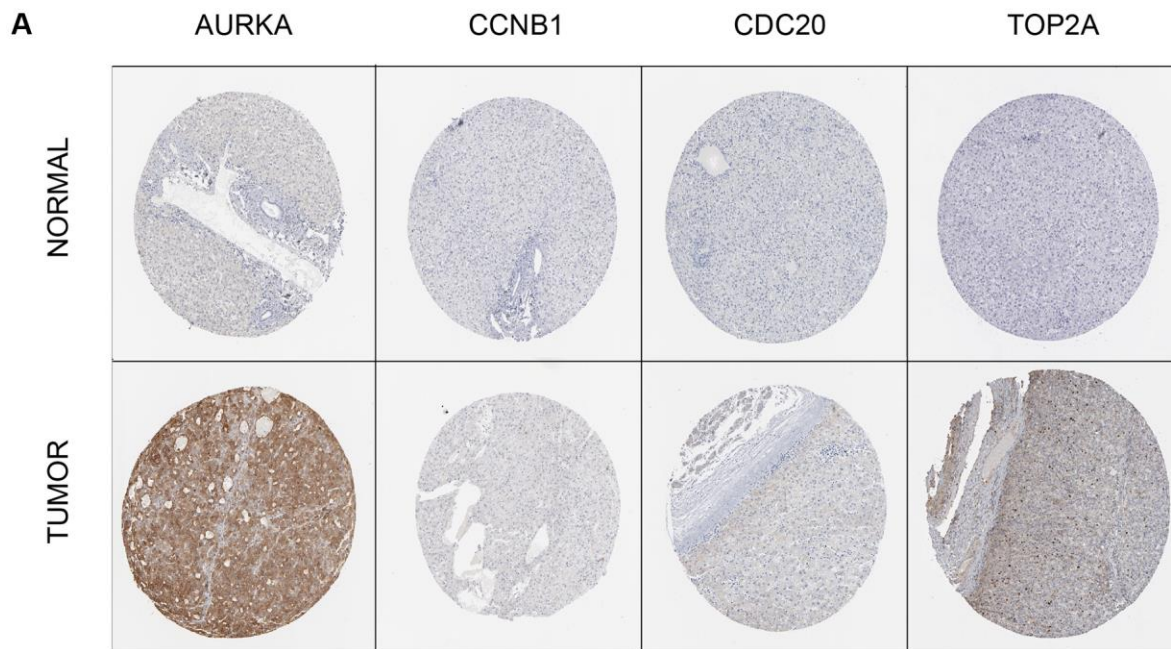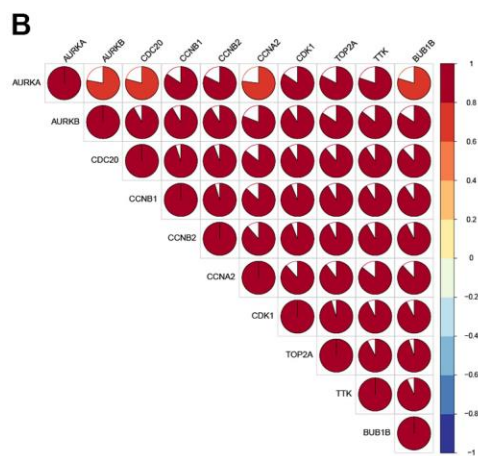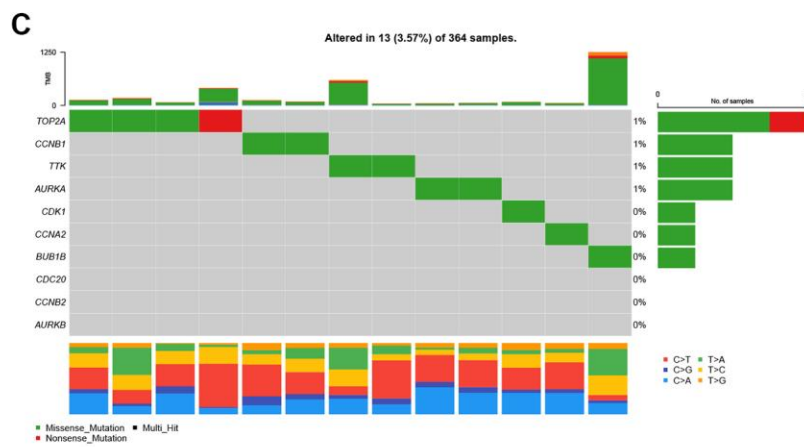

**Supplementary Figure 3. Multi-omics analyses of identified key molecules.** (A) Immunohistochemical results of HPA database. (B) The ten key genes were positively correlated. (C) Mutation analysis of 10 genes.

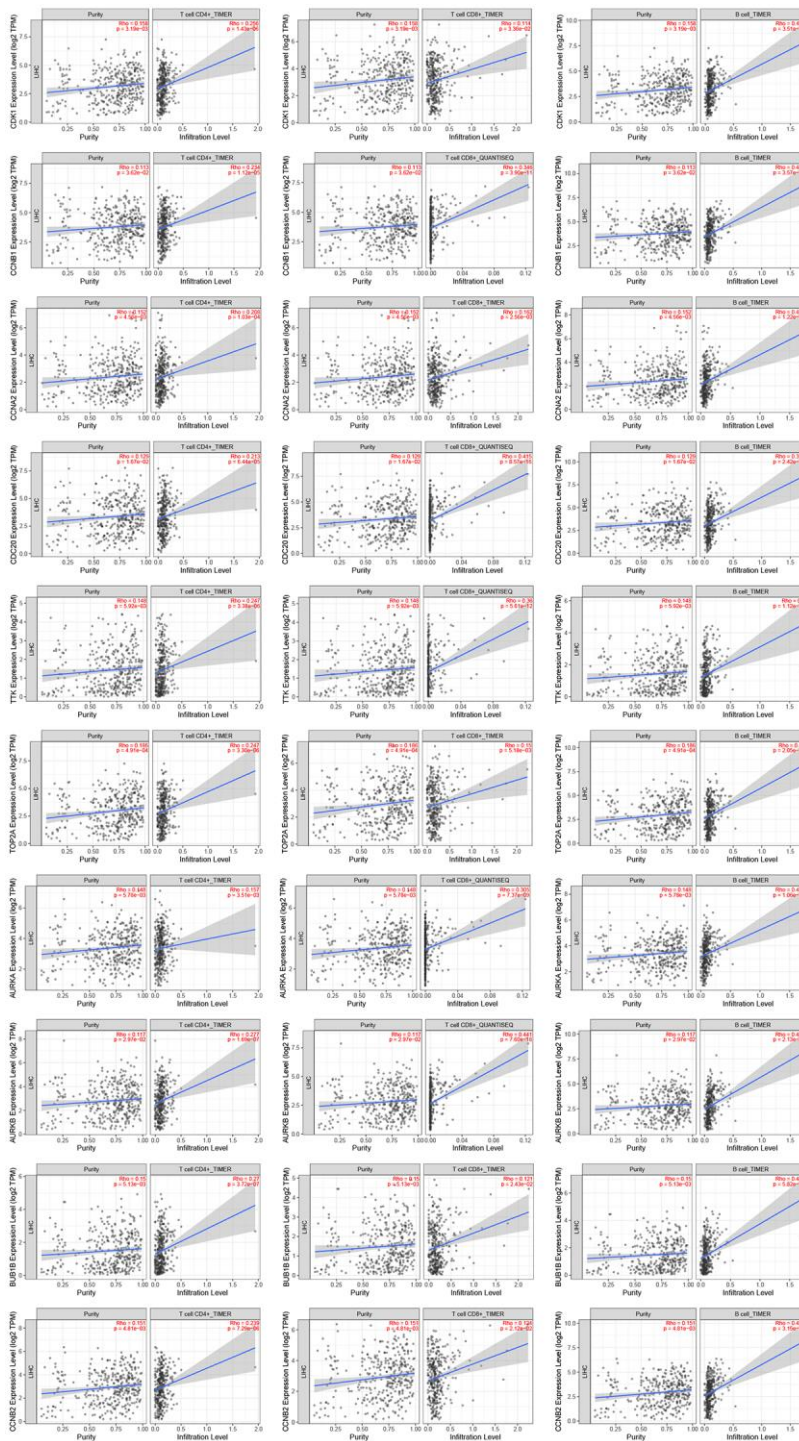

**Supplementary Figure 4.** The correlation between 10 key genes and immune cells was shown in the Timer database. The correlation between 10 key genes and immune cells was shown in the Timer database.

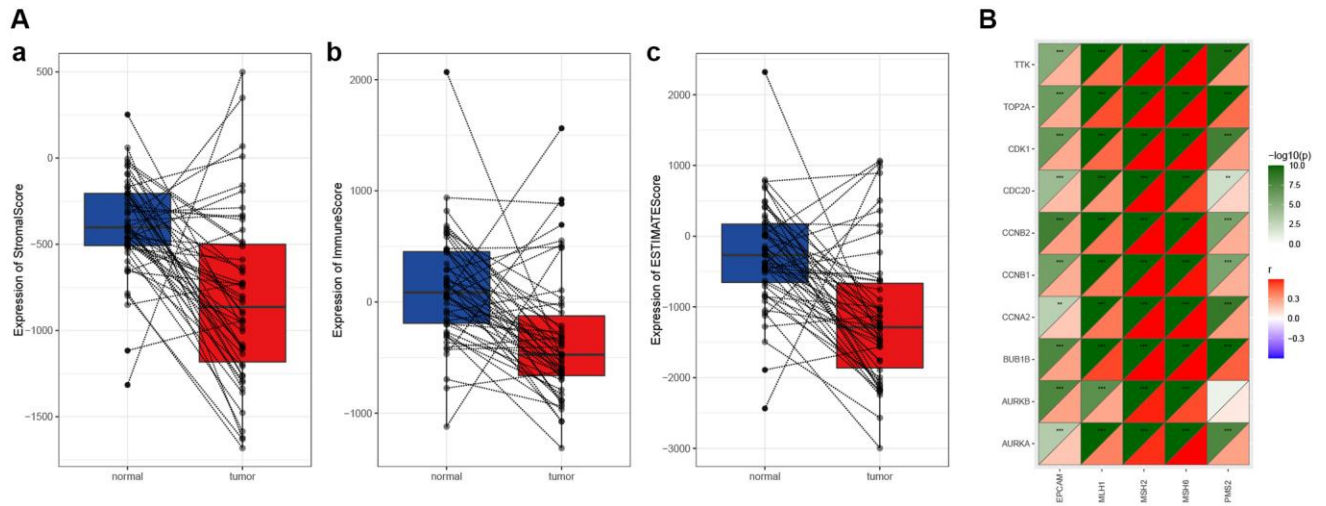

**Supplementary Figure 5. The tumor microenvironment and DNA repair gene analysis. (A)** The immune and matrix scores in the tumor microenvironment were lower in HCC than in normal tissues. **(B)** Key genes are closely related to multiple DNA repair genes.
